# Supplementary material for: Disparities in health condition diagnoses among aging transgender and cisgender medicare beneficiaries, 2008-2017
Source: PubMed Central journal article supplement (PMC10040837; doi:10.3389/fendo.2023.1102348), 2023-03-13
Supplement: Table_1.pdf [file Table_1.pdf]

**Supplemental Table 1.** Unadjusted prevalence of health condition diagnoses stratified by inferred gender in a national age-entitled Medicare population, 2008-2017

|                                                 | TRANSGENDER    |       |                |       |                         |       | CISGENDER           |       |                       |       |
|-------------------------------------------------|----------------|-------|----------------|-------|-------------------------|-------|---------------------|-------|-----------------------|-------|
|                                                 | TFN<br>N=4,198 |       | TMN<br>N=2,762 |       | Unclassified<br>N=3,015 |       | Male<br>N=1,294,690 |       | Female<br>N=1,666,946 |       |
|                                                 | N              | %     | N              | %     | N                       | %     | N                   | %     | N                     | %     |
| <b>CANCER</b>                                   |                |       |                |       |                         |       |                     |       |                       |       |
| Breast                                          | 26             | 0.6%  | 367            | 13.3% | 122                     | 4.0%  | 2,029               | 0.2%  | 141,699               | 8.5%  |
| Colorectal                                      | 204            | 4.9%  | 132            | 4.8%  | 101                     | 3.3%  | 42,742              | 3.3%  | 48,351                | 2.9%  |
| Endometrial                                     | ---            | ---   | 85             | 3.1%  | ---                     | ---   | ---                 | ---   | 25,281                | 1.5%  |
| Lung                                            | 151            | 3.6%  | 114            | 4.1%  | 94                      | 3.1%  | 41,659              | 3.2%  | 40,460                | 2.4%  |
| Prostate                                        | 698            | 16.6% | ---            | ---   | ---                     | ---   | 159,196             | 12.3% | ---                   | ---   |
| <b>HEART, LUNG, &amp; KIDNEY<br/>CONDITIONS</b> |                |       |                |       |                         |       |                     |       |                       |       |
| Asthma                                          | 706            | 16.8% | 656            | 23.8% | 516                     | 17.1% | 109,325             | 8.4%  | 211,096               | 12.7% |
| Cardiac Arrhythmia                              | 1,046          | 24.9% | 675            | 24.4% | 612                     | 20.3% | 227,603             | 17.6% | 246,487               | 14.8% |
| Chronic Kidney Disease                          | 2,101          | 50.0% | 1,320          | 47.8% | 1,252                   | 41.5% | 406,431             | 31.4% | 454,226               | 27.2% |
| Congestive Heart Failure                        | 1,619          | 38.6% | 1,167          | 42.3% | 1,135                   | 37.6% | 353,371             | 27.3% | 452,657               | 27.2% |
| COPD                                            | 1,587          | 37.8% | 1,111          | 40.2% | 1,076                   | 35.7% | 321,038             | 24.8% | 392,914               | 23.6% |
| Coronary Artery Disease                         | 2,505          | 59.7% | 1,589          | 57.5% | 1,492                   | 49.5% | 587,029             | 45.3% | 637,958               | 38.3% |
| Hyperlipemia                                    | 3,430          | 81.7% | 2,274          | 82.3% | 1,996                   | 66.2% | 788,727             | 60.9% | 1,025,980             | 61.5% |
| Hypertension                                    | 3,495          | 83.3% | 2,346          | 84.9% | 2,252                   | 74.7% | 859,723             | 66.4% | 1,117,285             | 67.0% |
| Stroke                                          | 883            | 21.0% | 692            | 25.1% | 591                     | 19.6% | 189,082             | 14.6% | 262,262               | 15.7% |
| <b>INFECTIOUS DISEASES</b>                      |                |       |                |       |                         |       |                     |       |                       |       |
| Hepatitis                                       | 149            | 3.5%  | 73             | 2.6%  | 101                     | 3.3%  | 16,028              | 1.2%  | 14,707                | 0.9%  |
| HIV/AIDS                                        | 42             | 1.0%  | < 11           | ---   | 38                      | 1.3%  | 2,396               | 0.2%  | 1,184                 | 0.1%  |
| <b>OTHER HEALTH CONDITIONS</b>                  |                |       |                |       |                         |       |                     |       |                       |       |
| Arthritis                                       | 2,484          | 59.2% | 2,088          | 75.6% | 1,537                   | 51.0% | 496,412             | 38.3% | 831,289               | 49.9% |
| Diabetes                                        | 1,884          | 44.9% | 1,182          | 42.8% | 1,108                   | 36.7% | 427,602             | 33.0% | 502,215               | 30.1% |
| Osteoporosis                                    | 475            | 11.3% | 1,172          | 42.4% | 774                     | 25.7% | 66,004              | 5.1%  | 473,972               | 28.4% |
| <b>MENTAL HEALTH<br/>CONDITIONS</b>             |                |       |                |       |                         |       |                     |       |                       |       |
| Dementia                                        | 1,054          | 25.1% | 839            | 30.4% | 897                     | 29.8% | 210,079             | 16.2% | 356,774               | 21.4% |
| Depression                                      | 1,946          | 46.4% | 1,550          | 56.1% | 1,395                   | 46.3% | 260,171             | 20.1% | 534,063               | 32.0% |
| Schizophrenia                                   | 418            | 10.0% | 293            | 10.6% | 344                     | 11.4% | 59,746              | 4.6%  | 105,263               | 6.3%  |
| <b>SUBSTANCE USE DISORDERS</b>                  |                |       |                |       |                         |       |                     |       |                       |       |
| Alcohol                                         | 365            | 8.7%  | 121            | 4.4%  | 165                     | 5.5%  | 59,720              | 4.6%  | 27,265                | 1.6%  |
| Drug                                            | 250            | 6.0%  | 201            | 7.3%  | 195                     | 6.5%  | 28,843              | 2.2%  | 39,069                | 2.3%  |
| Tobacco                                         | 729            | 17.4% | 416            | 15.1% | 485                     | 16.1% | 144,113             | 11.1% | 129,175               | 7.7%  |

*Note.* TFN = Trans Feminine and Nonbinary; TMN = Trans Masculine and Nonbinary. Cells with an N of 11 or less are suppressed.
