# Supplementary material for: Disparities in health condition diagnoses among aging transgender and cisgender medicare beneficiaries, 2008-2017
Source: PubMed Central journal article supplement (PMC10040837; doi:10.3389/fendo.2023.1102348), 2023-03-13
Supplement: Table_2.pdf [file Table_2.pdf]

**Supplemental Table 2.** Mean differences in the predicted probabilities of health condition diagnoses by inferred gender in a national age-entitled Medicare population, 2008-2017.

| <b>Condition</b>                            | <b>Group 1</b> | <b>Group 2</b>   | <b>Estimate</b> | <b>95% CI</b> |       | <b>P-Value</b> |
|---------------------------------------------|----------------|------------------|-----------------|---------------|-------|----------------|
| <b>CANCER</b>                               |                |                  |                 |               |       |                |
| Breast                                      | TFN            | TMN              | -3.13           | -3.53         | -2.73 | <.0001         |
|                                             | TFN            | Cisgender Male   | 1.13            | 0.74          | 1.52  | <.0001         |
|                                             | TFN            | Cisgender Female | -2.92           | -3.31         | -2.53 | <.0001         |
|                                             | TMN            | Cisgender Male   | 4.25            | 4.13          | 4.37  | <.0001         |
|                                             | TMN            | Cisgender Female | 0.21            | 0.10          | 0.32  | <b>0.0003</b>  |
|                                             | Cisgender Male | Cisgender Female | -4.05           | -4.09         | -4.00 | <.0001         |
| Colorectal                                  | TFN            | TMN              | 0.15            | -0.07         | 0.38  | 0.18           |
|                                             | TFN            | Cisgender Male   | 0.28            | 0.13          | 0.42  | <b>0.0001</b>  |
|                                             | TFN            | Cisgender Female | 0.55            | 0.41          | 0.69  | <.0001         |
|                                             | TMN            | Cisgender Male   | 0.12            | -0.05         | 0.30  | 0.17           |
|                                             | TMN            | Cisgender Female | 0.40            | 0.22          | 0.57  | <.0001         |
|                                             | Cisgender Male | Cisgender Female | 0.27            | 0.26          | 0.29  | <.0001         |
| Endometrial                                 | TMN            | Cisgender Female | 0.45            | 0.24          | 0.67  | <.0001         |
| Lung                                        | TFN            | TMN              | -0.08           | -0.33         | 0.17  | 0.51           |
|                                             | TFN            | Cisgender Male   | 0.09            | -0.07         | 0.25  | 0.27           |
|                                             | TFN            | Cisgender Female | 0.42            | 0.26          | 0.58  | <.0001         |
|                                             | TMN            | Cisgender Male   | 0.18            | -0.01         | 0.36  | 0.07           |
|                                             | TMN            | Cisgender Female | 0.51            | 0.32          | 0.69  | <.0001         |
|                                             | Cisgender Male | Cisgender Female | 0.33            | 0.32          | 0.34  | <.0001         |
| Prostate                                    | TFN            | Cisgender Male   | 0.11            | 0.03          | 0.20  | <b>0.01</b>    |
| <b>HEART, LUNG, &amp; KIDNEY CONDITIONS</b> |                |                  |                 |               |       |                |
| Asthma                                      | TFN            | TMN              | -0.32           | -0.45         | -0.20 | <.0001         |
|                                             | TFN            | Cisgender Male   | 0.52            | 0.44          | 0.60  | <.0001         |
|                                             | TFN            | Cisgender Female | 0.14            | 0.06          | 0.23  | <b>0.001</b>   |
|                                             | TMN            | Cisgender Male   | 0.84            | 0.75          | 0.93  | <.0001         |
|                                             | TMN            | Cisgender Female | 0.47            | 0.38          | 0.56  | <.0001         |
|                                             | Cisgender Male | Cisgender Female | -0.38           | -0.38         | -0.37 | <.0001         |
| Cardiac Arrhythmia                          | TFN            | TMN              | 0.22            | 0.10          | 0.34  | <b>0.0003</b>  |
|                                             | TFN            | Cisgender Male   | 0.25            | 0.17          | 0.32  | <.0001         |
|                                             | TFN            | Cisgender Female | 0.67            | 0.59          | 0.74  | <.0001         |
|                                             | TMN            | Cisgender Male   | 0.03            | -0.06         | 0.12  | 0.52           |
|                                             | TMN            | Cisgender Female | 0.45            | 0.36          | 0.54  | <.0001         |
|                                             | Cisgender Male | Cisgender Female | 0.42            | 0.41          | 0.43  | <.0001         |
| Chronic Kidney Disease                      | TFN            | TMN              | 0.31            | 0.21          | 0.42  | <.0001         |
|                                             | TFN            | Cisgender Male   | 0.57            | 0.50          | 0.63  | <.0001         |
|                                             | TFN            | Cisgender Female | 0.96            | 0.90          | 1.03  | <.0001         |
|                                             | TMN            | Cisgender Male   | 0.25            | 0.17          | 0.33  | <.0001         |
|                                             | TMN            | Cisgender Female | 0.65            | 0.57          | 0.73  | <.0001         |
|                                             | Cisgender Male | Cisgender Female | 0.40            | 0.39          | 0.41  | <.0001         |
| Congestive Heart Failure                    | TFN            | TMN              | 0.04            | -0.07         | 0.15  | 0.43           |
|                                             | TFN            | Cisgender Male   | 0.44            | 0.37          | 0.51  | <.0001         |
|                                             | TFN            | Cisgender Female | 0.69            | 0.62          | 0.76  | <.0001         |

|                            |                |                  |       |       |      |               |
|----------------------------|----------------|------------------|-------|-------|------|---------------|
|                            | TMN            | Cisgender Male   | 0.40  | 0.31  | 0.48 | <.0001        |
|                            | TMN            | Cisgender Female | 0.65  | 0.56  | 0.73 | <.0001        |
|                            | Cisgender Male | Cisgender Female | 0.25  | 0.24  | 0.26 | <.0001        |
| COPD                       | TFN            | TMN              | 0.06  | -0.05 | 0.16 | 0.28          |
|                            | TFN            | Cisgender Male   | 0.44  | 0.38  | 0.51 | <.0001        |
|                            | TFN            | Cisgender Female | 0.66  | 0.60  | 0.73 | <.0001        |
|                            | TMN            | Cisgender Male   | 0.38  | 0.30  | 0.47 | <.0001        |
|                            | TMN            | Cisgender Female | 0.61  | 0.53  | 0.69 | <.0001        |
|                            | Cisgender Male | Cisgender Female | 0.22  | 0.22  | 0.23 | <.0001        |
| Coronary Artery Disease    | TFN            | TMN              | 0.35  | 0.24  | 0.46 | <.0001        |
|                            | TFN            | Cisgender Male   | 0.33  | 0.26  | 0.40 | <.0001        |
|                            | TFN            | Cisgender Female | 0.90  | 0.83  | 0.97 | <.0001        |
|                            | TMN            | Cisgender Male   | -0.02 | -0.10 | 0.06 | 0.64          |
|                            | TMN            | Cisgender Female | 0.55  | 0.46  | 0.63 | <.0001        |
|                            | Cisgender Male | Cisgender Female | 0.57  | 0.56  | 0.57 | <.0001        |
| Hyperlipemia               | TFN            | TMN              | 0.29  | 0.14  | 0.43 | <.0001        |
|                            | TFN            | Cisgender Male   | 0.48  | 0.39  | 0.57 | <.0001        |
|                            | TFN            | Cisgender Female | 0.57  | 0.49  | 0.66 | <.0001        |
|                            | TMN            | Cisgender Male   | 0.19  | 0.08  | 0.30 | <b>0.0007</b> |
|                            | TMN            | Cisgender Female | 0.29  | 0.18  | 0.40 | <.0001        |
|                            | Cisgender Male | Cisgender Female | 0.10  | 0.09  | 0.10 | <.0001        |
| Hypertension               | TFN            | TMN              | 0.19  | 0.04  | 0.34 | <b>0.01</b>   |
|                            | TFN            | Cisgender Male   | 0.48  | 0.39  | 0.57 | <.0001        |
|                            | TFN            | Cisgender Female | 0.61  | 0.52  | 0.70 | <.0001        |
|                            | TMN            | Cisgender Male   | 0.29  | 0.17  | 0.41 | <.0001        |
|                            | TMN            | Cisgender Female | 0.42  | 0.30  | 0.54 | <.0001        |
|                            | Cisgender Male | Cisgender Female | 0.13  | 0.13  | 0.14 | <.0001        |
| Stroke                     | TFN            | TMN              | -0.05 | -0.18 | 0.07 | 0.37          |
|                            | TFN            | Cisgender Male   | 0.29  | 0.21  | 0.37 | <.0001        |
|                            | TFN            | Cisgender Female | 0.40  | 0.32  | 0.48 | <.0001        |
|                            | TMN            | Cisgender Male   | 0.34  | 0.25  | 0.44 | <.0001        |
|                            | TMN            | Cisgender Female | 0.45  | 0.36  | 0.54 | <.0001        |
|                            | Cisgender Male | Cisgender Female | 0.11  | 0.10  | 0.11 | <.0001        |
| <b>INFECTIOUS DISEASES</b> |                |                  |       |       |      |               |
| Hepatitis                  | TFN            | TMN              | 0.39  | 0.10  | 0.68 | <b>0.008</b>  |
|                            | TFN            | Cisgender Male   | 0.90  | 0.74  | 1.07 | <.0001        |
|                            | TFN            | Cisgender Female | 1.30  | 1.14  | 1.47 | <.0001        |
|                            | TMN            | Cisgender Male   | 0.51  | 0.28  | 0.75 | <.0001        |
|                            | TMN            | Cisgender Female | 0.91  | 0.67  | 1.15 | <.0001        |
|                            | Cisgender Male | Cisgender Female | 0.40  | 0.38  | 0.42 | <.0001        |
| HIV/AIDS                   | TFN            | TMN              | 2.32  | 1.15  | 3.50 | <b>0.0001</b> |
|                            | TFN            | Cisgender Male   | 1.55  | 1.24  | 1.87 | <.0001        |
|                            | TFN            | Cisgender Female | 2.59  | 2.27  | 2.90 | <.0001        |
|                            | TMN            | Cisgender Male   | -0.77 | -1.90 | 0.37 | 0.18          |
|                            | TMN            | Cisgender Female | 0.27  | -0.87 | 1.40 | 0.64          |
|                            | Cisgender Male | Cisgender Female | 1.04  | 0.97  | 1.11 | <.0001        |

---

**OTHER HEALTH CONDITIONS**

---

|              |                |                  |       |       |       |        |
|--------------|----------------|------------------|-------|-------|-------|--------|
| Arthritis    | TFN            | TMN              | -0.69 | -0.81 | -0.57 | <.0001 |
|              | TFN            | Cisgender Male   | 0.47  | 0.40  | 0.54  | <.0001 |
|              | TFN            | Cisgender Female | 0.02  | -0.05 | 0.09  | 0.55   |
|              | TMN            | Cisgender Male   | 1.15  | 1.05  | 1.25  | <.0001 |
|              | TMN            | Cisgender Female | 0.71  | 0.61  | 0.81  | <.0001 |
|              | Cisgender Male | Cisgender Female | -0.44 | -0.45 | -0.44 | <.0001 |
| Diabetes     | TFN            | TMN              | 0.24  | 0.14  | 0.34  | <.0001 |
|              | TFN            | Cisgender Male   | 0.26  | 0.20  | 0.32  | <.0001 |
|              | TFN            | Cisgender Female | 0.52  | 0.45  | 0.58  | <.0001 |
|              | TMN            | Cisgender Male   | 0.02  | -0.06 | 0.10  | 0.65   |
|              | TMN            | Cisgender Female | 0.27  | 0.19  | 0.35  | <.0001 |
|              | Cisgender Male | Cisgender Female | 0.25  | 0.25  | 0.26  | <.0001 |
| Osteoporosis | TFN            | TMN              | -1.81 | -1.94 | -1.68 | <.0001 |
|              | TFN            | Cisgender Male   | 0.56  | 0.46  | 0.66  | <.0001 |
|              | TFN            | Cisgender Female | -1.51 | -1.61 | -1.41 | <.0001 |
|              | TMN            | Cisgender Male   | 2.37  | 2.28  | 2.45  | <.0001 |
|              | TMN            | Cisgender Female | 0.30  | 0.21  | 0.38  | <.0001 |
|              | Cisgender Male | Cisgender Female | -2.07 | -2.08 | -2.06 | <.0001 |

---

**MENTAL HEALTH CONDITIONS**

---

|               |                |                  |       |       |       |        |
|---------------|----------------|------------------|-------|-------|-------|--------|
| Dementia      | TFN            | TMN              | -0.07 | -0.19 | 0.06  | 0.29   |
|               | TFN            | Cisgender Male   | 0.59  | 0.51  | 0.67  | <.0001 |
|               | TFN            | Cisgender Female | 0.48  | 0.40  | 0.56  | <.0001 |
|               | TMN            | Cisgender Male   | 0.66  | 0.56  | 0.75  | <.0001 |
|               | TMN            | Cisgender Female | 0.54  | 0.45  | 0.64  | <.0001 |
|               | Cisgender Male | Cisgender Female | -0.11 | -0.12 | -0.11 | <.0001 |
| Depression    | TFN            | TMN              | -0.27 | -0.37 | -0.17 | <.0001 |
|               | TFN            | Cisgender Male   | 1.06  | 0.99  | 1.12  | <.0001 |
|               | TFN            | Cisgender Female | 0.49  | 0.43  | 0.56  | <.0001 |
|               | TMN            | Cisgender Male   | 1.33  | 1.25  | 1.41  | <.0001 |
|               | TMN            | Cisgender Female | 0.76  | 0.68  | 0.84  | <.0001 |
|               | Cisgender Male | Cisgender Female | -0.57 | -0.57 | -0.56 | <.0001 |
| Schizophrenia | TFN            | TMN              | 0.13  | -0.03 | 0.29  | 0.12   |
|               | TFN            | Cisgender Male   | 0.82  | 0.72  | 0.93  | <.0001 |
|               | TFN            | Cisgender Female | 0.71  | 0.60  | 0.81  | <.0001 |
|               | TMN            | Cisgender Male   | 0.69  | 0.57  | 0.82  | <.0001 |
|               | TMN            | Cisgender Female | 0.58  | 0.45  | 0.71  | <.0001 |
|               | Cisgender Male | Cisgender Female | -0.11 | -0.13 | -0.10 | <.0001 |

---

**SUBSTANCE USE DISORDERS**

---

|         |                |                  |       |       |       |        |
|---------|----------------|------------------|-------|-------|-------|--------|
| Alcohol | TFN            | TMN              | 0.80  | 0.59  | 1.01  | <.0001 |
|         | TFN            | Cisgender Male   | 0.45  | 0.35  | 0.56  | <.0001 |
|         | TFN            | Cisgender Female | 1.56  | 1.45  | 1.67  | <.0001 |
|         | TMN            | Cisgender Male   | -0.34 | -0.53 | -0.16 | 0.0002 |
|         | TMN            | Cisgender Female | 0.76  | 0.58  | 0.94  | <.0001 |
|         | Cisgender Male | Cisgender Female | 1.10  | 1.09  | 1.12  | <.0001 |
| Drug    | TFN            | TMN              | -0.11 | -0.30 | 0.08  | 0.26   |

|         |                |                  |      |       |      |               |
|---------|----------------|------------------|------|-------|------|---------------|
|         | TFN            | Cisgender Male   | 0.78 | 0.65  | 0.91 | <.0001        |
|         | TFN            | Cisgender Female | 0.80 | 0.67  | 0.93 | <.0001        |
|         | TMN            | Cisgender Male   | 0.89 | 0.75  | 1.04 | <.0001        |
|         | TMN            | Cisgender Female | 0.91 | 0.77  | 1.06 | <.0001        |
| Tobacco | Cisgender Male | Cisgender Female | 0.02 | 0.01  | 0.04 | <b>0.007</b>  |
|         | TFN            | TMN              | 0.24 | 0.11  | 0.37 | <b>0.0004</b> |
|         | TFN            | Cisgender Male   | 0.29 | 0.21  | 0.37 | <.0001        |
|         | TFN            | Cisgender Female | 0.72 | 0.64  | 0.80 | <.0001        |
|         | TMN            | Cisgender Male   | 0.05 | -0.05 | 0.16 | 0.34          |
|         | TMN            | Cisgender Female | 0.48 | 0.37  | 0.58 | <.0001        |
|         | Cisgender Male | Cisgender Female | 0.42 | 0.42  | 0.43 | <.0001        |

*Notes.* TFN = Trans Feminine and Nonbinary; TMN = Trans Masculine and Nonbinary; CI=95% Confidence Intervals. Bolded variables significant at  $p < 0.05$ .
